# Supplementary material for: Improving porous properties of activated carbon from carbon gel by the OTA method
Source: Royal Society of Chemistry journal article supplement (doi:10.1039/d3ra01647a), 2023-01-01
Supplement: d3ra01647a1.pdf [file d3ra01647a1.pdf]

# Improving porous properties of activated carbon from carbon gel by the OTA method

Panuwat Lawtae <sup>\*ab</sup>, Shintaroh Nagaishi <sup>b</sup>, Chaiyot Tangsathitkulchai <sup>a</sup>,  
Shinichiroh Iwamura <sup>c</sup>, and Shin R. Mukai <sup>\*c</sup>

<sup>a</sup> School of Chemical Engineering, Suranaree University of Technology, Nakhon Ratchasima 30000, Thailand

<sup>b</sup> Graduate School of Chemical Sciences and Engineering, Hokkaido University, Sapporo 060-8628, Japan

<sup>c</sup> Division of Applied Chemistry, Faculty of Engineering, Hokkaido University, Sapporo 060-8628, Japan

\*Corresponding authors: [smukai@eng.hokudai.ac.jp](mailto:smukai@eng.hokudai.ac.jp), [pnwlawtae@gmail.com](mailto:pnwlawtae@gmail.com)

## Peak separation of TPD analysis

To estimate the amount of each type of oxygen-containing functional group, we conducted peak separation of the TPD spectra of CO and CO<sub>2</sub>. The desorption temperature and full width at half maximum (FWHM) were determined based on the literature [1-3]. Peak separation from the obtained TPD spectra was conducted using the conditions shown in Table S1, and the peak fitting results are presented in Figure S1.

**Table S1** Peak separation conditions of CO and CO<sub>2</sub> from TPD spectra

| Functional groups | Peak temperature (°C) | FWHM (°C) | Desorption gas       |
|-------------------|-----------------------|-----------|----------------------|
| Carboxylic #1     | 240                   | 150       | CO <sub>2</sub>      |
| Carboxylic #2     | 340                   | 150       | CO <sub>2</sub>      |
| Anhydride         | 490                   | 130       | CO <sub>2</sub> + CO |
| Lactone#1         | 600                   | 130       | CO <sub>2</sub>      |
| Lactone#2         | 700                   | 130       | CO <sub>2</sub>      |
| Phenol/Ether#1    | 550                   | 125       | CO                   |
| Phenol/Ether#2    | 640                   | 125       | CO                   |
| Phenol/Ether#3    | 750                   | 150       | CO                   |
| Carbonyl#1        | 900                   | 150       | CO                   |
| Carbonyl#2        | 1030                  | 100       | CO                   |
| Carbonyl#3        | 1125                  | 150       | CO                   |

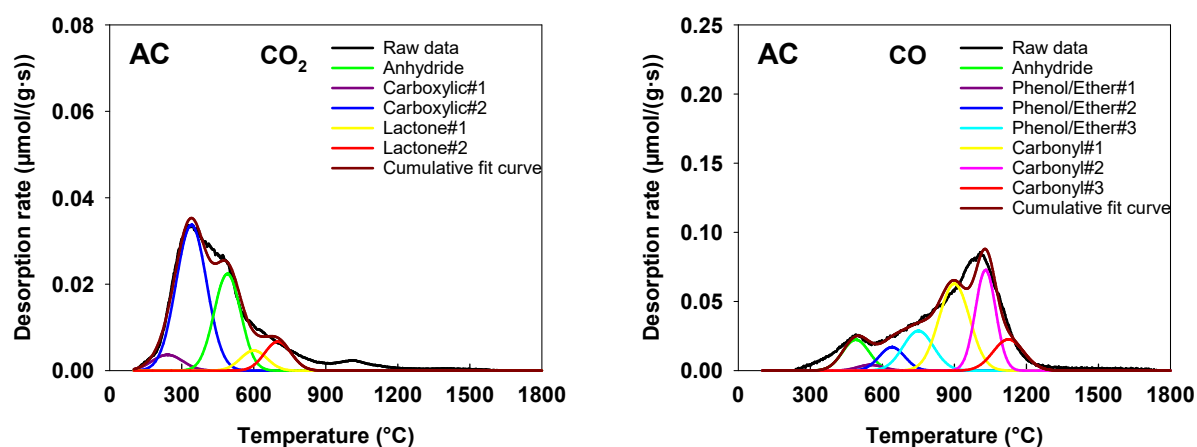

**Figure S1** Cont.

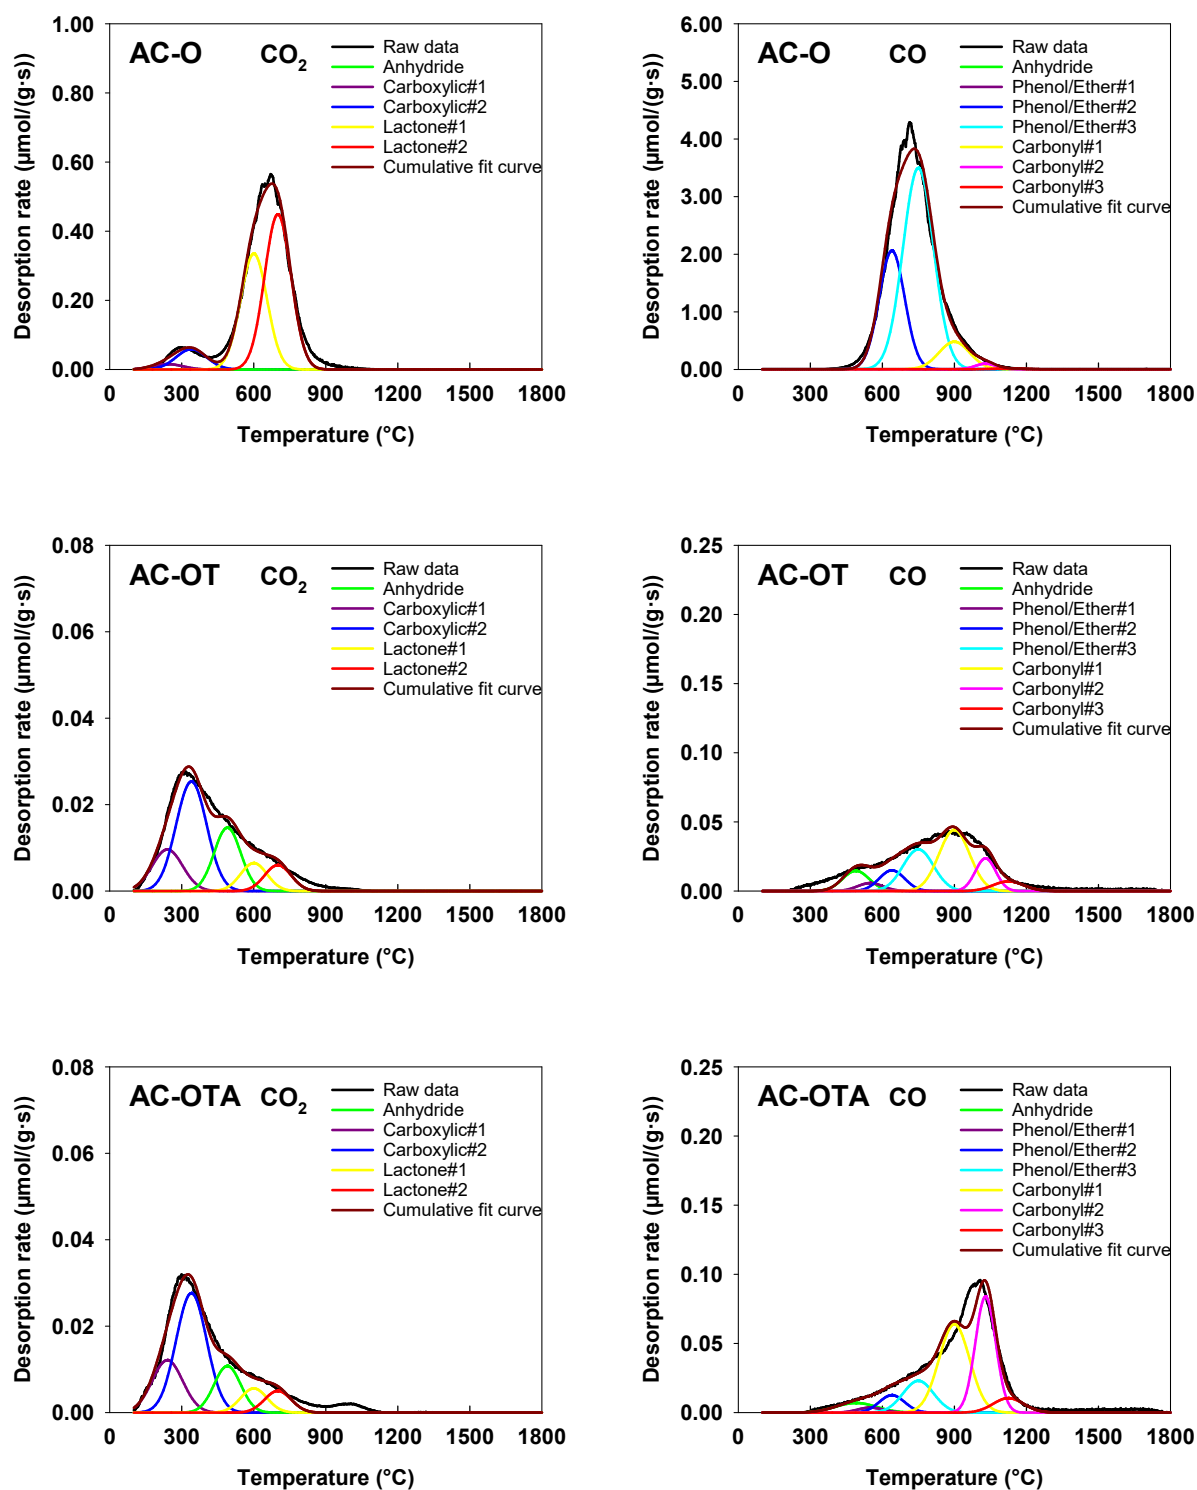

**Figure S1** Peak fitting results of TPD profiles for activated carbon gels using a Gaussian function. The black lines represent the TPD experimental data, and the colored lines show the fitting profiles optimized by the Levenberg-Marquardt method.

## References

1. Li, N., X. Ma, Q. Zha, K. Kim, Y. Chen, and C. Song, *Maximizing the number of oxygen-containing functional groups on activated carbon by using ammonium persulfate and improving the temperature-programmed desorption characterization of carbon surface chemistry*. Carbon, 2011. **49**(15): p. 5002-5013.
2. Ishii, T., S. Kashihara, Y. Hoshikawa, J.-i. Ozaki, N. Kannari, K. Takai, T. Enoki, and T. Kyotani, *A quantitative analysis of carbon edge sites and an estimation of graphene sheet size in high-temperature treated, non-porous carbons*. Carbon, 2014. **80**: p. 135-145.
3. Ishii, T. and J.-i. Ozaki, *Understanding the chemical structure of carbon edge sites by using deuterium-labeled temperature-programmed desorption technique*. Carbon, 2020. **161**: p. 343-349.
